# Supplementary material
Source: HighWire-hosted journal article supplement (https://www.cmajopen.ca/highwire/filestream/81295/field_highwire_adjunct_files/2/2019-0204-3-at.pdf)
Supplement: 2019-0204-3-at.pdf [file 2019-0204-3-at.pdf]

### **Appendix 3 (as supplied by the authors): Position statements of Canadian chiropractic associations regarding vaccination (accessed 8 Feb 2020)**

#### **Canadian Chiropractic Association:**

“Vaccination is not within the scope of chiropractic practice in Canada. Notwithstanding, the Canadian Chiropractic Association recognizes that vaccination is a safe and effective public health practice for the prevention of infectious diseases. Members are encouraged to refer all patient questions, consultation and education regarding immunization and vaccinations to the appropriate public health authorities and/or health professional whose scope of practice includes vaccination.”

<https://www.chiropractic.ca/about-cca/code-of-ethics/vaccination-immunization/>

#### **Manitoba:**

“The Manitoba Chiropractors Association (MCA) is a proponent of preventative healthcare and recognizes that vaccination and immunization are established public health practices in the protection of individuals from infectious diseases. Vaccination is not within the scope of chiropractic practice. The MCA directs its members to not provide advice on the topic of vaccination and immunization. Patients are encouraged to be an active participant in their healthcare by making informed decisions. Appropriate sources for patient consultation regarding vaccination and immunization are public health professionals for whom vaccination and immunization is within their scope of practice. The MCA regulates the chiropractic profession in Manitoba under The Chiropractic Act. The MCA is dedicated to regulating the chiropractic profession in a manner that supports quality care and upholds public trust; as well as furthering awareness and understanding of the benefits of chiropractic care.”

<http://manitobachiropractors.ca/wp-content/uploads/2017/10/Vaccination-and-Immunization-Position-Statement-.pdf>

#### **British Columbia:**

“The BC Chiropractic Association (BCCA) strongly supports preventive health care and the protection of individuals from the serious consequences of infectious disease. The BCCA supports that immunization is a well-established and widely mandated public health policy to protect individuals against infectious disease.

As health care practitioners you may be asked about vaccinations. While administering vaccinations is outside the scope of practice of individual chiropractors, as an evidence-based health care profession, the BCCA takes the position that vaccinations recommended by public health bodies such as the B.C. Ministry of Health are effective evidence-based practices of great

value to the health of the population. If patients have questions about immunization, they should be referred to their physician or the public health unit of a provincial health authority.”

<https://www.bcchiro.com/about-us/position-statements/>

### **Alberta:**

“While the Alberta College and Association of Chiropractors (ACAC) is a strong proponent of preventive health care and the protection of individuals from infectious disease, vaccination and immunization are not within the scope of practice for chiropractic.

The ACAC directs members to refrain from providing advice about vaccination or immunization, and encourages patients to make informed decisions in consultation with public health professionals.

The ACAC regulates the chiropractic profession in Alberta under the Health Professions Act. The ACAC is dedicated to regulating the chiropractic profession in a manner that supports quality care and upholds public trust; as well as furthering awareness and understanding of the benefits of chiropractic care.”

[https://albertachiro.com/ACAC/ChiropracticinAlberta/Regulation\\_and\\_governance/Position\\_statements/ACAC/Chiropractic\\_in\\_Alberta/Regulation%20and%20governance/Position\\_Statements.aspx?hkey=5ae485f3-3101-4f2d-b245-e3b066f6cd01](https://albertachiro.com/ACAC/ChiropracticinAlberta/Regulation_and_governance/Position_statements/ACAC/Chiropractic_in_Alberta/Regulation%20and%20governance/Position_Statements.aspx?hkey=5ae485f3-3101-4f2d-b245-e3b066f6cd01)

### **Ontario:**

The Ontario Chiropractic Association supports vaccination and immunization as established public health practices in the prevention of infectious diseases. Vaccination is not within the scope of chiropractic practice. The appropriate sources for patient consultation and education regarding vaccination and immunization are public health authorities and health professionals with a scope of practice that includes vaccination.

<https://www.chiropractic.on.ca/members/about-oca/position-statements/immunization-and-vaccination/>

<https://www.chiropractic.on.ca/immunization-and-vaccination/>
